# Supplementary material
Source: PubMed Central journal article supplement (PMC9904877)
Supplement: 43450_2023_370_MOESM1_ESM.pdf [file 43450_2023_370_MOESM1_ESM.pdf]

## Supplementary material

### **Molecular, and Therapeutic Insights of Alpha-Lipoic Acid as a Potential Molecule for Disease Prevention**

Amit Kumar Tripathi<sup>1,2\*#</sup>, Anup Kumar Ray<sup>3#</sup>, Sunil Kumar Mishra<sup>4\*</sup>, Siddharth Mall Bishen<sup>5</sup>, Hirdyesh Mishra<sup>5</sup>, Aman Khurana<sup>4</sup>

<sup>1</sup>School of Basic and Applied Science, Galgotias University, Gautam Buddha Nagar, UP, India.

<sup>2</sup>Molecular Biology Unit, Institute of Medical Science, Banaras Hindu University, Varanasi, 221005, India.

<sup>3</sup>Department of Natural Products, National Institute of Pharmaceutical Education and Research, S.A.S. Nagar, Punjab.

<sup>4</sup>Department of Pharmaceutical Engineering and Technology, Indian Institute of Technology (Banaras Hindu University, Varanasi, 221005, India

<sup>5</sup>Department of Physics (MMV), Banaras Hindu University (BHU), Varanasi, India.

#Amit Kumar Tripathi and Anup Kumar Ray have equal contribution.

**Table S1** List of ongoing clinical trials on ALA

| S. No. | Condition & (Number of Participants)              | Phase 1, 2, 3 or 4 & (Status) | Dose, Duration                        | Principal Investigator affiliation                                            | Duration (months) | Clinical trial registry number |
|--------|---------------------------------------------------|-------------------------------|---------------------------------------|-------------------------------------------------------------------------------|-------------------|--------------------------------|
| 1      | <b>Adolescent Migraine (60)</b>                   | 4 (recruiting)                | 300 mg once daily for 12 weeks        | Dr. Monalisa Jena, M.D., All India Institute of Medical Sciences, Bhubaneswar | 18                | NCT04064814                    |
| 2      | <b>Non-Alcoholic Fatty Liver Disease (120)</b>    | 4 (Not yet recruiting)        | 600 mg twice daily for 12 weeks       | Dr. Monalisa Jena, M.D., All India Institute of Medical Sciences, Bhubaneswar | 18                | NCT04475276                    |
| 3      | <b>Diabetic Peripheral Neuropathy (150)</b>       | 4 (Not yet recruiting)        | 480 mg once daily for 12 weeks.       | Yuhan Corporation                                                             | 18                | NCT04846673                    |
| 4      | <b>Ischemic Stroke (120)</b>                      | 3 (recruiting)                | 600 mg/day for 12 weeks               | Kangho Choi, MD, PhD Chonnam National University Hospital                     | 41                | NCT04041167                    |
| 5      | <b>Head and neck squamous cell carcinoma (18)</b> | 1 (recruiting)                | 1200 mg/day & 1800 mg/day for 2 weeks | Jessica Mcdermott, MD, University of Colorado, Denver                         | 28                | NCT04042935                    |

|           |                                               |                            |                             |                                                                                          |    |             |
|-----------|-----------------------------------------------|----------------------------|-----------------------------|------------------------------------------------------------------------------------------|----|-------------|
| <b>6</b>  | <b>Multiple Sclerosis (118)</b>               | 2<br>(recruiting)          | 1200 mg daily for 104 weeks | Rebecca I. Spain, MD MSPH<br>VA Portland Health Care System, Portland, OR                | 62 | NCT03161028 |
| <b>7</b>  | <b>Cystinuria (50)</b>                        | 2<br>(recruiting)          | 1200 mg daily for 156 weeks | Thomas Chi, MD<br>University of California, San Francisco                                | 78 | NCT02910531 |
| <b>8</b>  | <b>Ischemic Heart Failure (300)</b>           | 4<br>(Not yet recruiting)  | 600 mg/day for 52 weeks     | Shanghai Zhongshan Hospital                                                              | 48 | NCT03491969 |
| <b>9</b>  | <b>Amyotrophic Lateral Sclerosis (150)</b>    | NA<br>(recruiting)         | 600 mg/day for 4 weeks      | Zhi-Ying Wu, MD&PhD, Second Affiliated Hospital, School of Medicine, Zhejiang University | 25 | NCT04518540 |
| <b>10</b> | <b>Diabetic Cardio-myopathies (100)</b>       | NA<br>(recruiting)         | 600 mg/day for 12 weeks     | Emile FERRARI, PUPH, Centre HospitalierUniversita ire de Nice                            | 24 | NCT04141475 |
| <b>11</b> | <b>Cervical Shortening Preterm Birth (54)</b> | NA<br>(Not yet recruiting) | -                           | Fabio Facchinetti, MD, University of Modena and Reggio Emilia                            | 14 | NCT03952533 |

|           |                                      |                           |                        |                                                                                                          |    |             |
|-----------|--------------------------------------|---------------------------|------------------------|----------------------------------------------------------------------------------------------------------|----|-------------|
| <b>12</b> | <b>Obstructive Sleep Apnea (106)</b> | 1<br>(Not yet recruiting) | 600 mg/day for 6 weeks | Glen Foster,<br>Associate Professor,<br>University of British Columbia                                   | 51 | NCT04021550 |
| <b>13</b> | <b>Cardiovascular Diseases (60)</b>  | NA<br>(recruiting)        | 300 mg<br>-            | Song-Young Park,<br>Principal Investigator,<br>University of Nebraska                                    | 13 | NCT03629613 |
| <b>14</b> | <b>Sterility Infertility (100)</b>   | 4<br>(recruiting)         | -                      | Johnny Awwad,<br>Professor of Obstetrics and Gynecology,<br>American University of Beirut Medical Center | 52 | NCT03177122 |
| <b>15</b> | <b>Cystic Fibrosis (80)</b>          | NA<br>(recruiting)        | 600 mg/day<br>-        | Ryan Harris,<br>Principal Investigator, Augusta University                                               | 80 | NCT02690064 |
| <b>16</b> | <b>Hypertension (72)</b>             | NA<br>(recruiting)        | -                      | Joel Douglas Trinity,<br>PhD, VA Salt Lake City Health Care System, Salt Lake City, UT                   | 95 | NCT02034422 |

**Table S2** Mulliken Charges of S and R Enantiomers

| Sl. No. | Atoms | Mulliken Charges |          |
|---------|-------|------------------|----------|
|         |       | SLA              | RLA      |
| 1.      | S1    | 0.05462          | -0.04592 |
| 2.      | S2    | 0.00477          | 0.02971  |
| 3.      | O3    | -0.40623         | -0.40486 |
| 4.      | O4    | -0.43985         | -0.44299 |
| 5.      | C5    | 0.09472          | 0.38019  |
| 6.      | C6    | -0.41138         | -0.78243 |
| 7.      | C7    | -0.35334         | -0.40062 |
| 8.      | C8    | -0.17923         | -0.02894 |
| 9.      | C9    | -0.4496          | -0.47207 |
| 10.     | C10   | -0.57508         | -0.47107 |
| 11.     | C11   | -0.6146          | -0.63832 |
| 12.     | C12   | 0.58247          | 0.59196  |
| 13.     | H13   | 0.22042          | 0.24489  |
| 14.     | H14   | 0.1483           | 0.15042  |
| 15.     | H15   | 0.1695           | 0.16702  |
| 16.     | H16   | 0.15799          | 0.15592  |
| 17.     | H17   | 0.17501          | 0.17946  |
| 18.     | H18   | 0.15059          | 0.12795  |
| 19.     | H19   | 0.1443           | 0.13428  |
| 20.     | H20   | 0.15434          | 0.15723  |
| 21.     | H21   | 0.16574          | 0.16575  |
| 22.     | H22   | 0.20778          | 0.20144  |
| 23.     | H23   | 0.20822          | 0.2078   |
| 24.     | H24   | 0.20157          | 0.1987   |
| 25.     | H25   | 0.20183          | 0.20786  |
| 26.     | H26   | 0.38713          | 0.38663  |
